# Supplementary material for: A Case Report of Perceptual Disturbances with Incidental Calcifications in the Cerebellum
Source: Hindawi journal article supplement (doi:10.1155/2021/2680674), 2021-09-29
Supplement: f1 [file 2680674.f1.pdf]

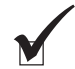

| Topic                           | Item | Checklist item description                                                                            | Reported on Page                                                           |
|---------------------------------|------|-------------------------------------------------------------------------------------------------------|----------------------------------------------------------------------------|
| <b>Title</b>                    | 1    | The words “case report” should be in the title along with the area of focus                           | <u>Title: Page 1</u>                                                       |
| <b>Key Words</b>                | 2    | 2 to 5 key words that identify areas covered in this case report.                                     | <u>Keywords: Page 1</u>                                                    |
| <b>Abstract</b>                 | 3a   | Introduction—What is unique about this case? What does it add to the medical literature?              | <u>Abstract, Background, Page 2</u>                                        |
|                                 | 3b   | The main symptoms of the patient and the important clinical findings                                  | <u>Abstract, Case Presentation, Page 2</u>                                 |
|                                 | 3c   | The main diagnoses, therapeutics interventions, and outcomes                                          | <u>Case Presentation, Page 4 &amp; 5</u>                                   |
|                                 | 3d   | Conclusion—What are the main “take-away” lessons from this case?                                      | <u>Abstract, Conclusion, page 2</u>                                        |
| <b>Introduction</b>             | 4    | One or two paragraphs summarizing why this case is unique with references                             | <u>Introduction, page 3 &amp; 4</u>                                        |
| <b>Patient Information</b>      | 5a   | De-identified demographic information and other patient specific information                          | <u>Case Presentation, page 4, paragraph 1</u>                              |
|                                 | 5b   | Main concerns and symptoms of the patient                                                             | <u>Case Presentation, page 4</u>                                           |
|                                 | 5c   | Medical, family, and psychosocial history including relevant genetic information (also see timeline). | <u>Case Presentation, Page 4</u>                                           |
|                                 | 5d   | Relevant past interventions and their outcomes                                                        | <u>Case Presentation, Page 4, Paragraph 3</u>                              |
| <b>Clinical Findings</b>        | 6    | Describe the relevant physical examination (PE) and other significant clinical findings.              | <u>Case Presentation, Page 4 &amp; 5, Paragraph 3 &amp; 4</u>              |
| <b>Timeline</b>                 | 7    | Important information from the patient’s history organized as a timeline                              | <u>Case Presentation, Page 4&amp; 5</u>                                    |
| <b>Diagnostic Assessment</b>    | 8a   | Diagnostic methods (such as PE, laboratory testing, imaging, surveys).                                | <u>Case Presentation, Page 5</u>                                           |
|                                 | 8b   | Diagnostic challenges (such as access, financial, or cultural)                                        | <u>N/A</u>                                                                 |
|                                 | 8c   | Diagnostic reasoning including other diagnoses considered                                             | <u>Discussion &amp; Conclusion, Page 7</u>                                 |
|                                 | 8d   | Prognostic characteristics (such as staging in oncology) where applicable                             | <u>N/A</u>                                                                 |
| <b>Therapeutic Intervention</b> | 9a   | Types of intervention (such as pharmacologic, surgical, preventive, self-care)                        | <u>Case Presentation, Page 5 &amp; 6, paragraph 5</u>                      |
|                                 | 9b   | Administration of intervention (such as dosage, strength, duration)                                   | <u>N/A</u>                                                                 |
|                                 | 9c   | Changes in intervention (with rationale)                                                              | <u>N/A</u>                                                                 |
| <b>Follow-up and Outcomes</b>   | 10a  | Clinician and patient-assessed outcomes (when appropriate)                                            | <u>Case Presentation, Page 5 &amp; 6, paragraph 5</u>                      |
|                                 | 10b  | Important follow-up diagnostic and other test results                                                 | <u>N/A</u>                                                                 |
|                                 | 10c  | Intervention adherence and tolerability (How was this assessed?)                                      | <u>N/A</u>                                                                 |
|                                 | 10d  | Adverse and unanticipated events                                                                      | <u>N/A</u>                                                                 |
| <b>Discussion</b>               | 11a  | Discussion of the strengths and limitations in your approach to this case                             | <u>N/A</u>                                                                 |
|                                 | 11b  | Discussion of the relevant medical literature.                                                        | <u>Discussion &amp; Conclusion, Page 6 &amp; 7</u>                         |
|                                 | 11c  | The rationale for conclusions (including assessment of possible causes)                               | <u>Discussion, Paragraph 1, Page 6</u>                                     |
|                                 | 11d  | The primary “take-away” lessons of this case report.                                                  | <u>Discussion &amp; Conclusion, Page 7 &amp; 8</u>                         |
| <b>Patient Perspective</b>      | 12   | When appropriate the patient should share their perspective on the treatments they received           | <u>N/A</u>                                                                 |
| <b>Informed Consent</b>         | 13   | Did the patient give informed consent? Please provide if requested                                    | <u>Yes <input checked="" type="checkbox"/> No <input type="checkbox"/></u> |
